# Supplementary material for: Reducing the contact and channel resistances of black phosphorusvialow-temperature vacuum annealing
Source: Royal Society of Chemistry journal article supplement (doi:10.1039/c7tc05325h), 2018-01-01
Supplement: c7tc05325h1.pdf [file c7tc05325h1.pdf]

## Supporting information

### Reducing the contact and channel resistances of black phosphorus via low-temperature vacuum annealing

Hyunik Park,<sup>a</sup> Jongha Son<sup>a</sup> and Jihyun Kim<sup>\*a</sup>

Department of Chemical and Biological Engineering, Korea University, Seoul 02841,  
South Korea

**\*Corresponding Author:** Jihyun Kim ([hyunhyun7@korea.ac.kr](mailto:hyunhyun7@korea.ac.kr))

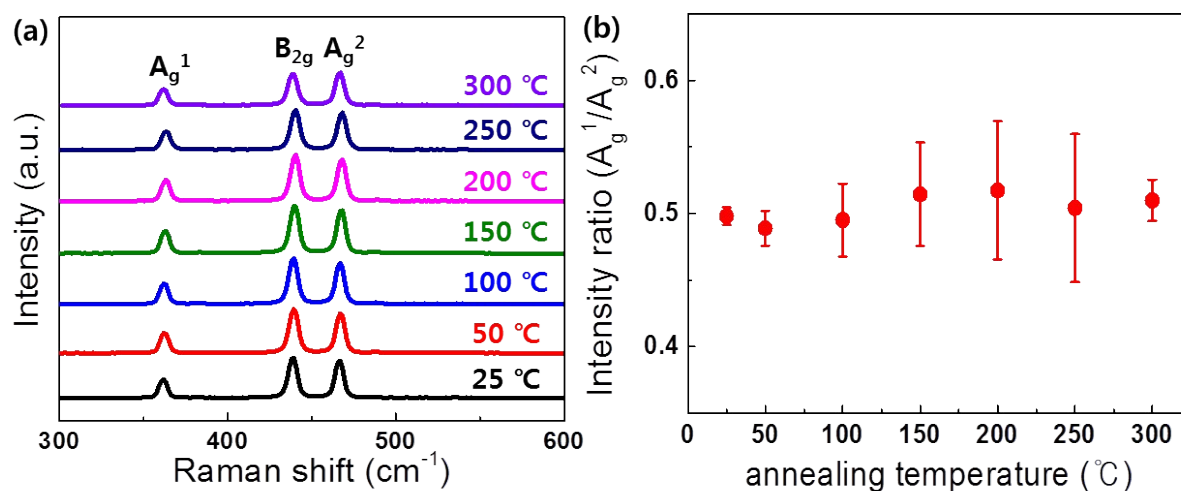

Figure S1 (a) micro-Raman spectra and (b) intensity ratio (A<sub>g</sub><sup>1</sup>/A<sub>g</sub><sup>2</sup>) of BP vacuum-annealed at different temperatures

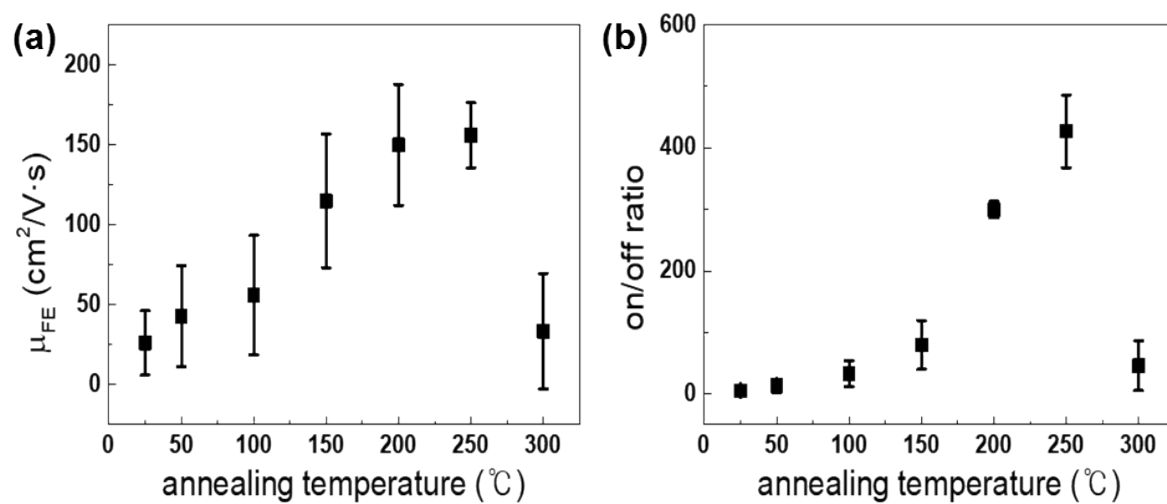

Figure S2 (a)  $\mu_{FE}$  and on/off ratio of BP FETs vacuum-annealed at different temperatures
